# Supplementary material for: Geospatial Cellular Distribution of Cancer-Associated Fibroblasts Significantly Impacts Clinical Outcomes in Metastatic Clear Cell Renal Cell Carcinoma
Source: Preprints.org preprint supplement (doi:10.20944/preprints202105.0629.v1), 2021-05-26
Supplement: Supplementary file 2 [file supplementary]

Supplemental Figure 1: A. Scatter plots and best-fit lines correlating tumor size with the immunohistochemistry-derived metrics used in the analysis. B: Correlation coefficients and their associated 95% confidence intervals and *P* values correlating tumor size with each immunohistochemistry-derived metric.
